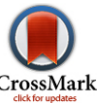

## Correction

# Correction: The Effect of Dietary Adaption on Cranial Morphological Integration in Capuchins (Order Primates, Genus *Cebus*)

## The PLOS ONE Staff

The word “Adaptation” is misspelled in the article title. The correct title is: The Effect of Dietary Adaptation on Cranial Morphological Integration in Capuchins (Order Primates, Genus “*Cebus*”). The correct citation is: Makedonska J, Wright BW, Strait DS (2012) The Effect of Dietary Adaptation on Cranial Morphological Integration in Capuchins (Order Primates, Genus “*Cebus*”). PLoS ONE 7(10): e40398. doi: 10.1371/journal.pone.0040398

## Reference

1. Makedonska J, Wright BW, Strait DS (2012) The Effect of Dietary Adaption on Cranial Morphological Integration in Capuchins (Order Primates, Genus *Cebus*). PLoS ONE 7(10): e40398. doi:10.1371/journal.pone.0040398

**Citation:** The PLOS ONE Staff (2014) Correction: The Effect of Dietary Adaption on Cranial Morphological Integration in Capuchins (Order Primates, Genus *Cebus*). PLoS ONE 9(6): e101378. doi:10.1371/journal.pone.0101378

**Published:** June 27, 2014

**Copyright:** © 2014 The PLOS ONE Staff. This is an open-access article distributed under the terms of the Creative Commons Attribution License, which permits unrestricted use, distribution, and reproduction in any medium, provided the original author and source are credited.
